# Supplementary material for: Overexpression of DNMT3b target genes during Enteric Nervous System development contribute to the onset of Hirschsprung disease
Source: PubMed Central journal article supplement (PMC5524929; doi:10.1038/s41598-017-06539-8), 2017-07-24
Supplement: 41598_2017_6539_MOESM1_ESM.pdf [file 41598_2017_6539_MOESM1_ESM.pdf]

## **SUPPLEMENTARY INFORMATION**

**TITLE:** Overexpression of DNMT3b target genes during Enteric Nervous System development contribute to the onset of Hirschsprung disease.

**AUTHORS:** Leticia Villalba-Benito<sup>1,2,#</sup>, Ana Torroglosa<sup>1,2,#</sup>, Raquel María Fernández<sup>1,2</sup>, Macarena Ruíz-Ferrer<sup>1,2</sup>, María José Moya-Jiménez<sup>3</sup>, Guillermo Antiñolo<sup>1,2</sup>, Salud Borrego<sup>1,2,\*</sup>.

# These authors contributed equally.

### **AFFILIATIONS:**

<sup>1</sup> Department of Genetics, Reproduction and Fetal Medicine. Institute of Biomedicine of Seville (IBIS), University Hospital Virgen del Rocío/CSIC/University of Seville, Seville, 41013, Spain.

<sup>2</sup> Centre for Biomedical Network Research on Rare Diseases (CIBERER), Seville, 41013, Spain.

<sup>3</sup> Department of Pediatric Surgery, University Hospital Virgen del Rocío, Seville, 41013, Spain.

### **\*CORRESPONDING AUTHOR:**

Salud Borrego, MD, PhD.

Department of Genetics, Reproduction and Fetal Medicine.

University Hospital Virgen del Rocío.

Avda. Manuel Siurot s/n. 41013 Seville, Spain

Voice: + 34 955 012780, Fax: + 34 955 012779

e-mail: salud.borrego.sspa@juntadeandalucia.es

**Table S1: Genes expressed in human enteric precursor cells.**

| <b>Gene</b>     | <b>Ct</b> | <b>Function</b>                                                                                                                                                                                                                                                                                                                                                             |
|-----------------|-----------|-----------------------------------------------------------------------------------------------------------------------------------------------------------------------------------------------------------------------------------------------------------------------------------------------------------------------------------------------------------------------------|
| <i>MYDGF</i>    | 26        | It is associated with several biological processes such as angiogenesis stimulating endothelial cell proliferation.                                                                                                                                                                                                                                                         |
| <i>CDK5RAP2</i> | 30        | It is essential for a correct mitotic cell cycle.                                                                                                                                                                                                                                                                                                                           |
| <i>DRG1</i>     | 29        | It has a potential role in proliferation and/or cell differentiation during development of nervous system.                                                                                                                                                                                                                                                                  |
| <i>EED</i>      | 32        | It is major component of Polycomb repressive complex 2, this is a epigenetic regulator that methylates histone H3 at lysine 27, controlling neural crest gene expression during neural crest development                                                                                                                                                                    |
| <i>KPNA1</i>    | 31        | It plays a key role in the nuclear transport of signal transducer and activator of transcription 3 (STAT3) and STAT1 transcription factors.                                                                                                                                                                                                                                 |
| <i>LITAF</i>    | 27        | Its main functions are inflammatory response and apoptosis.                                                                                                                                                                                                                                                                                                                 |
| <i>RAB10</i>    | 30        | It is implicated in vesicle trafficking. These events mediated vesicle trafficking by Rab10, are essential for axon development which is essential for proper neurons morphogenesis and thus for correct neuronal migration, and for dendrite growth and morphogenesis which is necessary for connectivity between neurons and to capture information from the environment. |
| <i>STAT3</i>    | 30        | It mediates the expression of a variety of genes in response to cell stimuli, and thus plays a key role in many cellular processes such as cell growth and apoptosis.                                                                                                                                                                                                       |
| <i>SULF1</i>    | 32        | It controls the neuronal and glial generation during ventral neural tube development. Also it is essential for normal migration of neural crest cells.                                                                                                                                                                                                                      |
| <i>BBX</i>      | 28        | It has been associated with maintaining neural stem cells, neural crest cells development and progenitor cell selfrenewal.                                                                                                                                                                                                                                                  |
| <i>PPP2R2B</i>  | 31        | It is widely expressed in embryonic mouse brain. At the cellular level it is limited to neurons and it plays a role in neuronal cell during brain development                                                                                                                                                                                                               |
| <i>RNA45s5</i>  | 29        | It is a non coding RNA which serves as the precursor for the 18S, 5.8S and 28S                                                                                                                                                                                                                                                                                              |

Figure S1

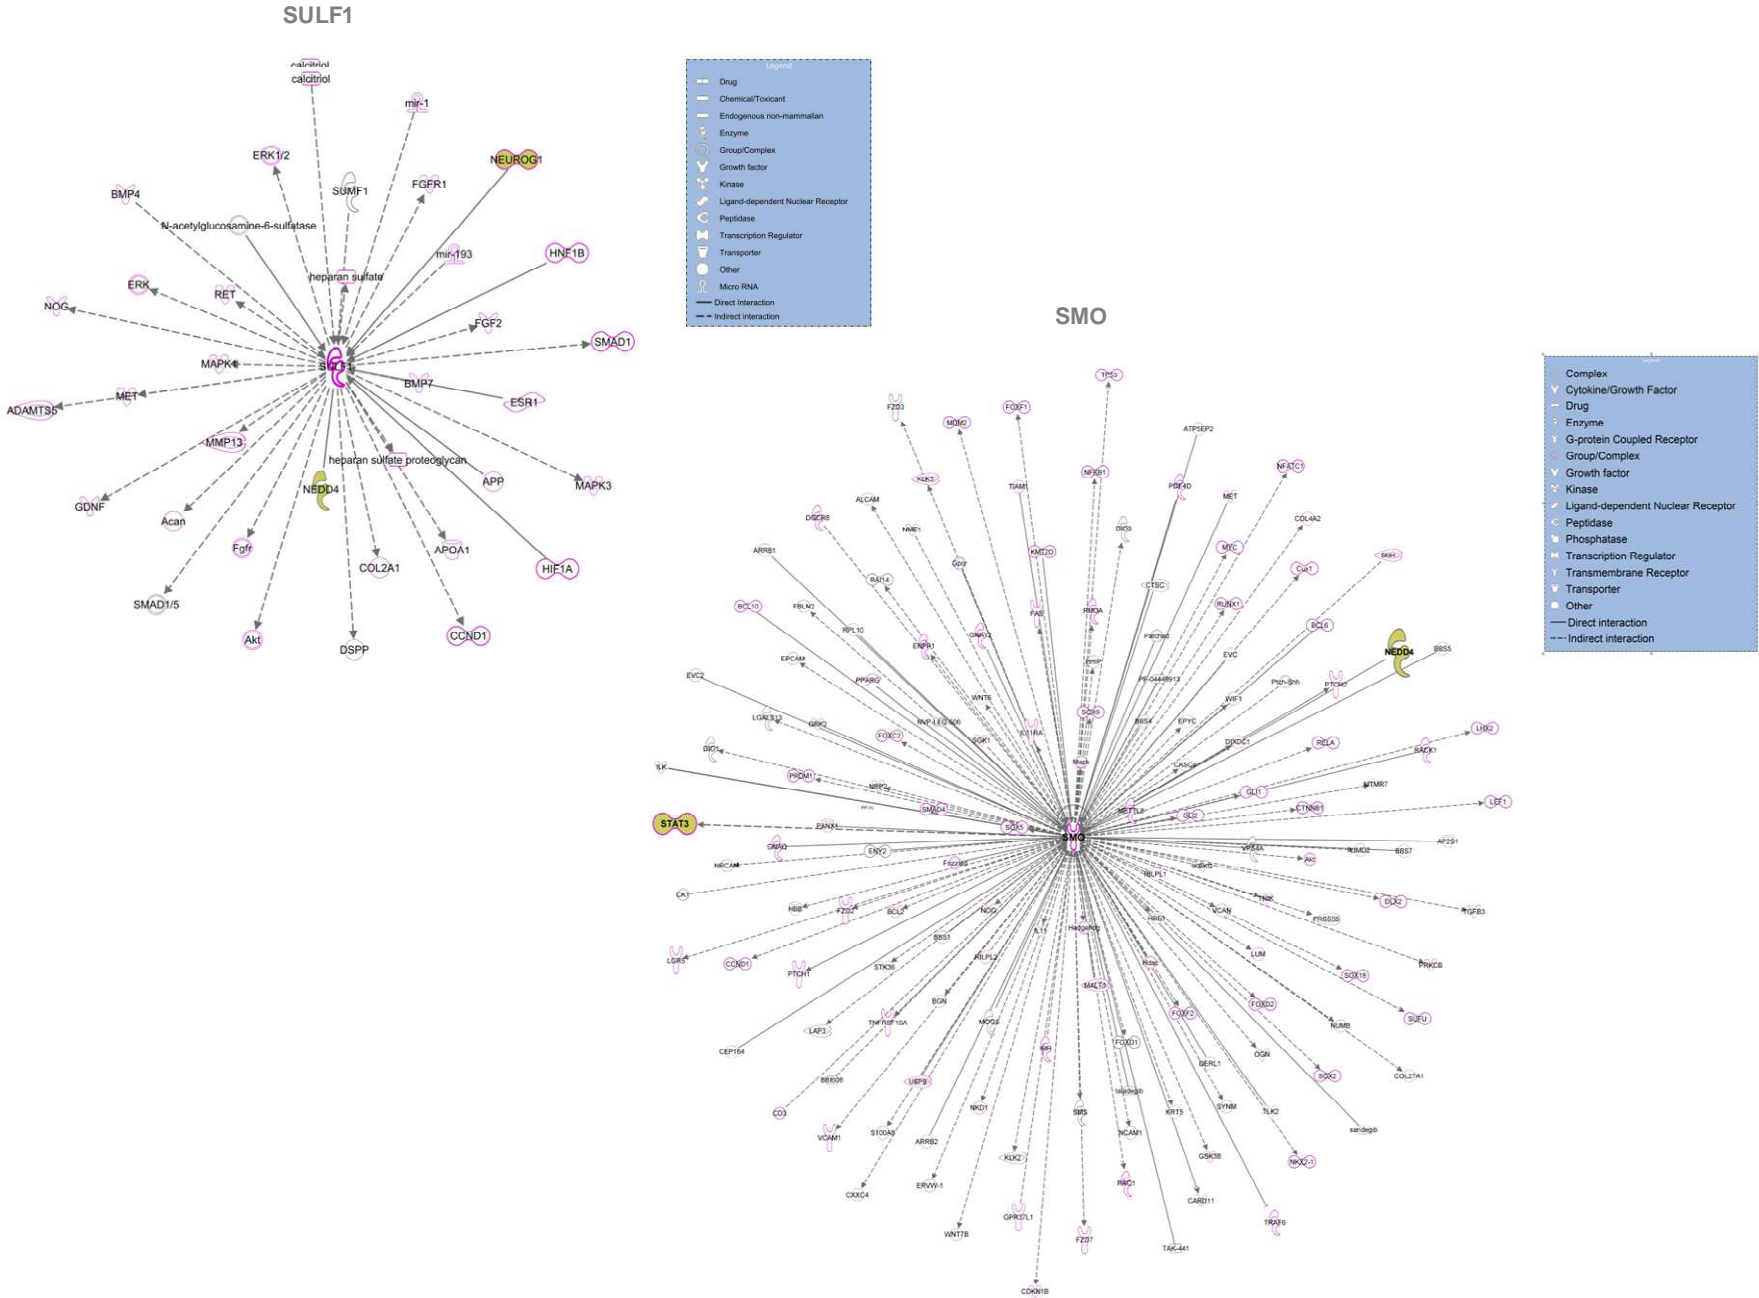

# KPNA1

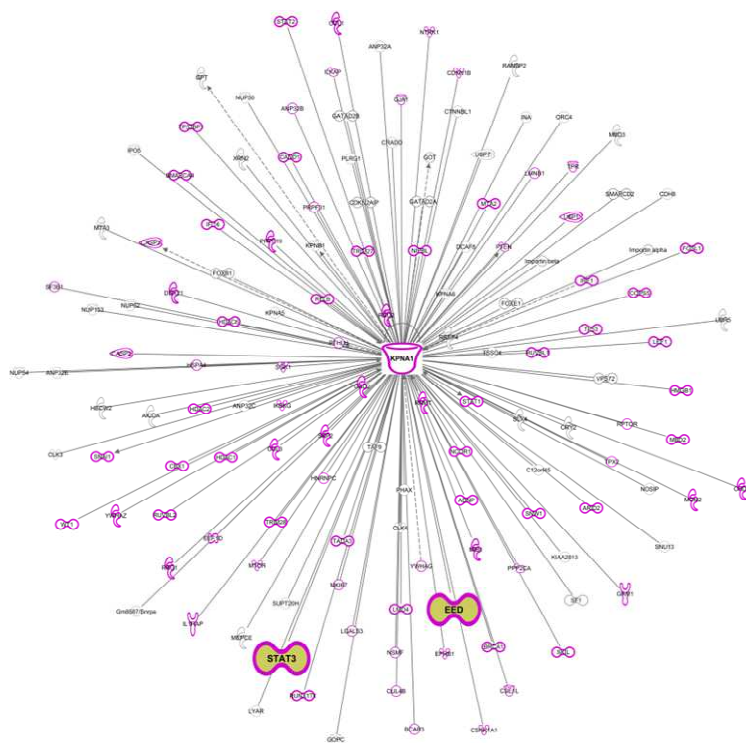

- Enzyme
- G-protein Coupled Receptor
- Group/Complex
- Kinase
- Peptidase
- Phosphatase
- Transcription Regulator
- Translation Regulator
- Transmembrane Receptor
- Transporter
- Other

— Direct interaction  
- - Indirect interaction

# CDK5RAP2

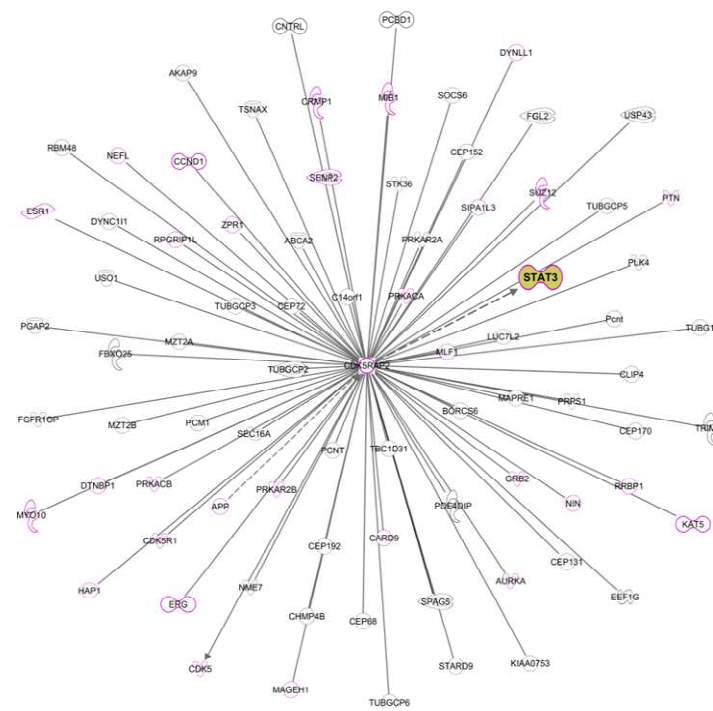

- Enzyme
- Growth factor
- Kinase
- Ligand-dependent Nuclear Receptor
- Phosphatase
- Transcription Regulator
- Translation Regulator
- Transporter
- Other

— Direct interaction  
- - Indirect interaction

# CHL1

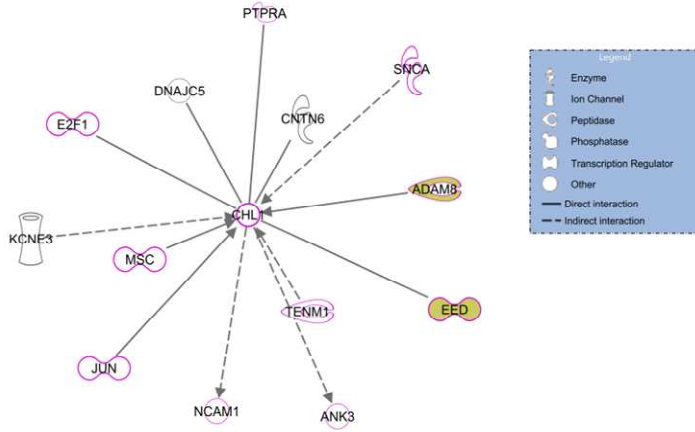

# PPP2R2B

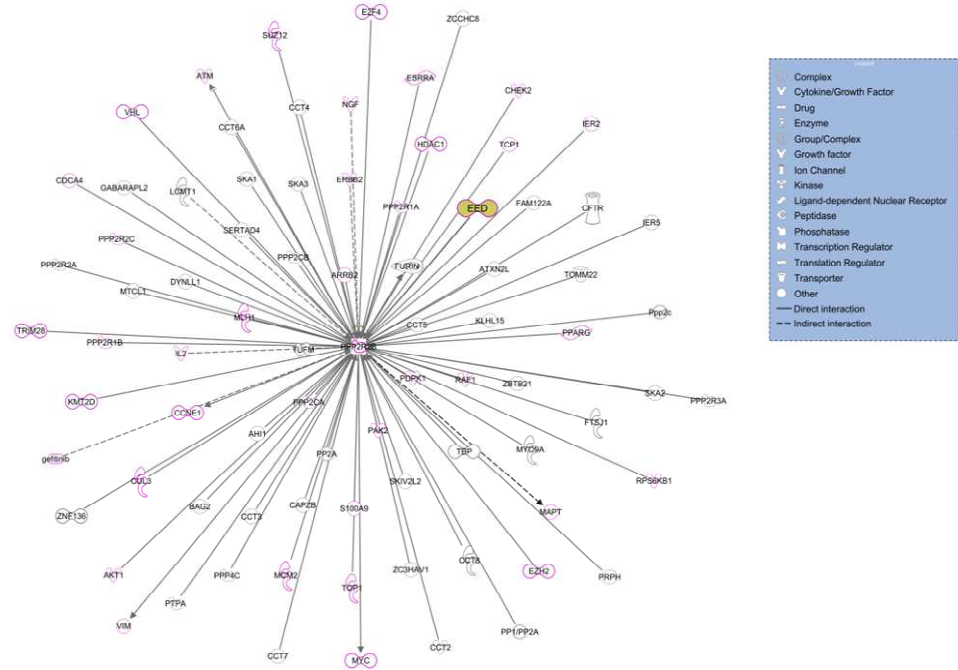

# LITAF

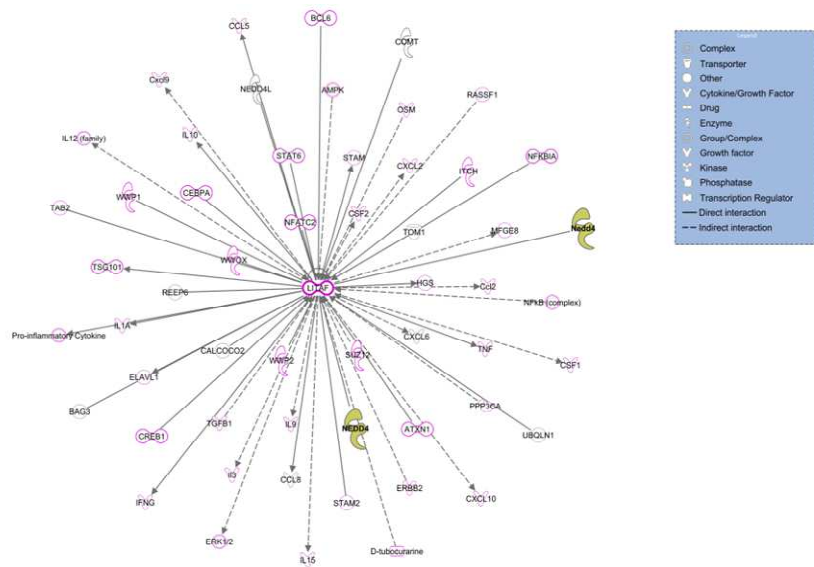

# BBX

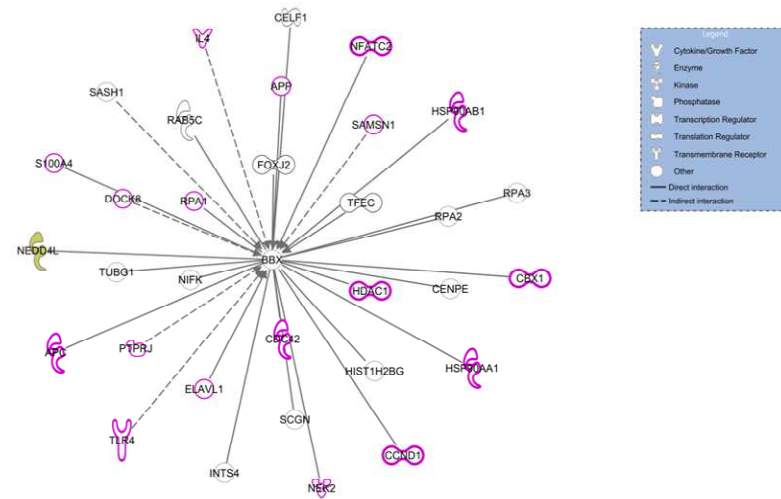

**Figure S1: Gene interaction of DNMT3b target genes.** Images obtained by the IPA tool. Relationships shown by straight lines represent; chemical-chemical interactions, chemical-protein interactions, correlation, protein-protein interactions and RNA-RNA interactions: non-targeting interactions. Relationships shown by arrows represent; activation, causation, expression, localization, membership, modification, molecular cleavage, phosphorylation, protein-DNA interactions, protein-RNA interactions, regulation of binding and transcription, and the direction of the effect caused. The genes highlighted by IPA with category "cellular development" are labeled in pink and the genes selected by us are labeled in yellow.
